# Supplementary material
Source: PubMed Central journal article supplement (PMC11028226)
Supplement: 262_2019_2368_MOESM1_ESM.pdf [file 262_2019_2368_MOESM1_ESM.pdf]

**Supplementary Figure 1**

**Immunohistochemical staining of patient 1's tumor.** **a** Carcinoma cells (C) stain positive for pan-Keratin, whereas inflammatory infiltrates (I) are negative. **b** Staining of T lymphocytes by anti-CD3, demonstrating an infiltration within the carcinoma with a relation of tumor cells (TC) to lymphocytes (TL) (TC : TL) of 3:1. **c** CD56 staining of natural killer cells (NK cells) with a relation of tumor cells (TC) to NK cells (TC : NK) of 15:1. **d** Low to moderate membranous staining for TRAIL-R1 in carcinoma and histiocytic cells. **e** TRAIL-R2 is low to moderately expressed in carcinoma cells and single histiocytic cells. **f** TRAIL stains positive, mainly in lymphocytes and NK cells. 200 x magnification in all stains.

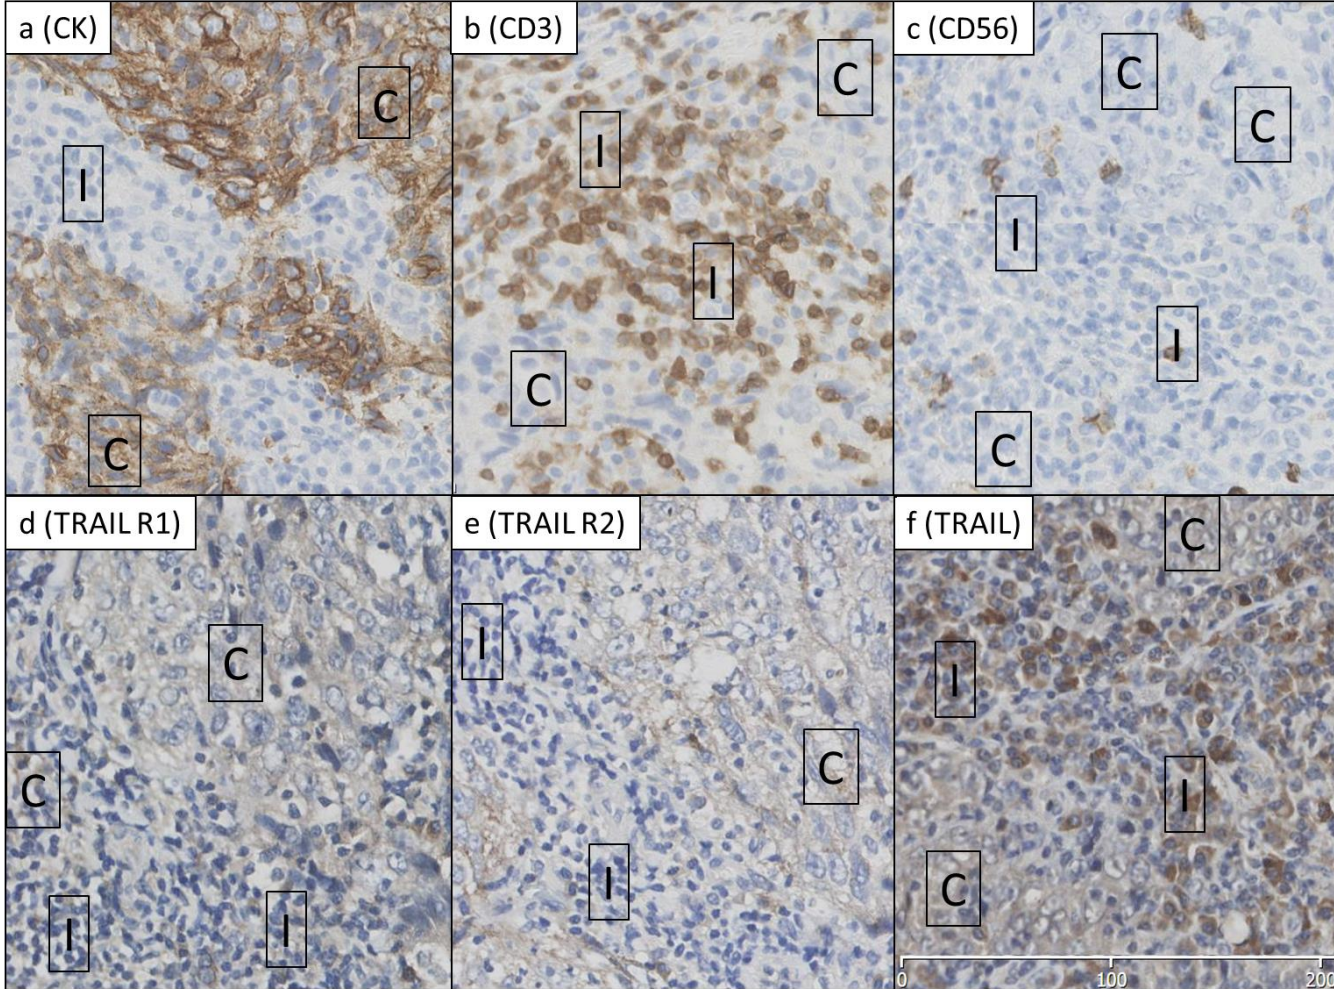

**Supplementary Figure 2**

**Increased NK cell cytotoxicity against NPC cells after administration of IFN $\beta$ .**  
Immunofluorescent imaging of IFN $\beta$ -stimulated or unstimulated NK cells from a healthy donor and NPC cells C666-1 at the beginning or 4h after coculture at an E:T ratio of 6:1. NK cells were stained by DAPI (blue), NPC cells by calcein (green).

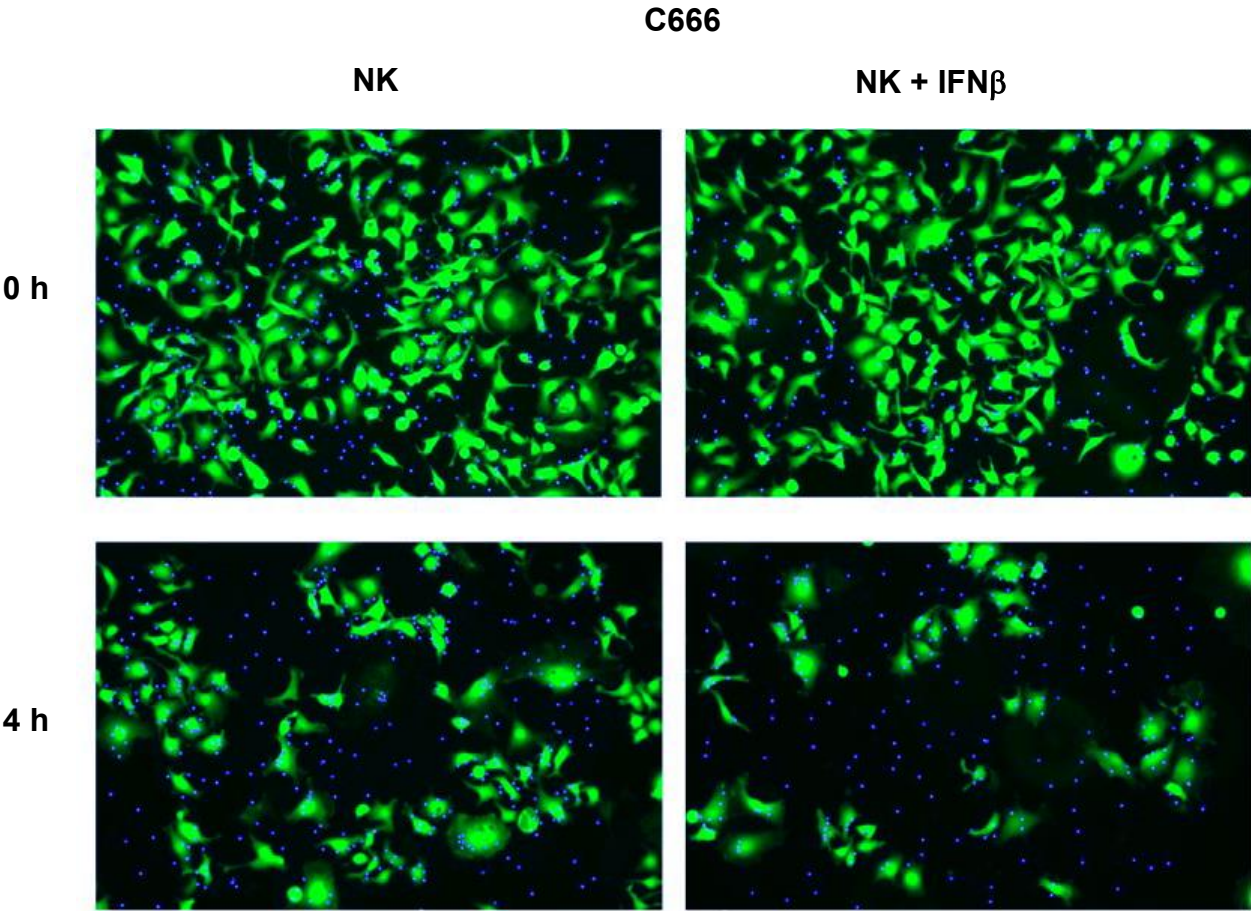

**Supplementary Table 1: Upregulation of TRAIL mRNA in NK cells from NPC patients treated with IFN $\beta$ .**

|                        | TRAIL   |         |         |
|------------------------|---------|---------|---------|
|                        | 0h      | 6h      | 24h     |
| <b>Patient 1</b>       | 2.84981 | 1.99956 | 10.9406 |
| <b>Patient 2</b>       | 3.10478 | 6.09973 | 16.1526 |
| <b>Healthy Donor 1</b> | 1.44607 | 15.0968 | 11.6360 |
| <b>Healthy Donor 2</b> | 1.09508 | 21.4286 | 26.5041 |

Values are given as TPM (transcripts per kilobase million). mRNA expression was analysed by RNAseq before, 6 h and 24 h after subcutaneous administration of 3 M U IFN $\beta$
